# Supplementary material for: Chemometric modeling and pharmacophore mapping in coronary heart disease: 2-arylbenzoxazoles as cholesteryl ester transfer protein inhibitors
Source: Royal Society of Chemistry journal article supplement (doi:10.1039/c1md00135c), 2011-01-01
Supplement: c1md00135c.pdf [file c1md00135c.pdf]

**Supplementary Information**

**Table s1.** Factor scores of PCR used for Eq. 3

| <b>Cpd.</b> | <b>f<sub>1</sub></b> | <b>f<sub>2</sub></b> | <b>f<sub>3</sub></b> | <b>f<sub>4</sub></b> | <b>f<sub>5</sub></b> | <b>f<sub>6</sub></b> | <b>f<sub>7</sub></b> | <b>f<sub>8</sub></b> | <b>f<sub>9</sub></b> | <b>f<sub>10</sub></b> | <b>f<sub>11</sub></b> | <b>f<sub>12</sub></b> | <b>f<sub>13</sub></b> | <b>f<sub>14</sub></b> |
|-------------|----------------------|----------------------|----------------------|----------------------|----------------------|----------------------|----------------------|----------------------|----------------------|-----------------------|-----------------------|-----------------------|-----------------------|-----------------------|
| 1           | -1.442               | -0.839               | -0.275               | 0.486                | 0.415                | -0.886               | -0.587               | 0.358                | -1.105               | -0.361                | 0.074                 | -0.426                | 0.111                 | 1.614                 |
| 2           | -1.102               | -0.307               | 0.442                | 0.563                | 0.606                | -0.580               | -0.148               | -0.633               | -0.156               | 0.763                 | -2.590                | -0.129                | 0.352                 | -0.441                |
| 3           | -1.036               | -0.072               | 0.334                | -0.955               | -0.677               | -0.995               | -0.032               | -0.543               | -0.034               | 0.445                 | -2.538                | 0.239                 | -0.565                | 1.639                 |
| 4           | -1.029               | -0.803               | -0.280               | -0.988               | -0.804               | -1.415               | -0.474               | 1.502                | -0.001               | 0.865                 | -0.162                | -0.151                | -0.210                | 1.460                 |
| 5           | -0.969               | -1.053               | -0.292               | -0.712               | -0.644               | -1.022               | -0.077               | 1.465                | -0.633               | -2.269                | 0.012                 | -0.315                | 0.514                 | -1.055                |
| 6           | -0.274               | -1.331               | -1.034               | -1.078               | -1.615               | 3.136                | 1.403                | 0.017                | -0.095               | 0.059                 | 1.157                 | -0.407                | 0.099                 | 0.222                 |
| 7           | -0.321               | -1.271               | -0.611               | -0.215               | 1.478                | 3.304                | -0.411               | -0.348               | -0.688               | 0.732                 | 1.467                 | 0.095                 | -0.560                | 0.564                 |
| 8           | -1.253               | 2.051                | -0.013               | -1.021               | 1.622                | -0.014               | 1.662                | -0.296               | -1.479               | 0.241                 | -0.058                | -0.691                | 0.105                 | 0.255                 |
| 9           | -1.191               | 1.777                | 0.122                | 1.108                | -0.269               | 0.443                | -0.699               | -0.365               | -2.354               | -0.498                | 0.688                 | -0.545                | -0.688                | 1.541                 |
| 10          | -0.751               | -0.080               | -0.689               | 1.499                | -1.212               | -0.130               | 1.933                | -0.259               | 0.935                | 0.305                 | 0.355                 | 0.009                 | -0.138                | -0.017                |
| 11          | -0.700               | -0.130               | -0.731               | 0.640                | 0.362                | -0.051               | -1.044               | -0.498               | 0.321                | -0.548                | 0.428                 | -0.233                | -0.031                | -0.034                |
| 12          | -0.717               | -0.112               | -0.608               | 1.116                | -0.602               | -0.293               | -0.529               | -0.067               | 0.370                | -1.289                | 0.302                 | -0.166                | -0.229                | 2.025                 |
| 13          | -1.090               | -0.502               | 1.604                | -0.604               | -0.512               | -0.173               | -0.210               | -0.510               | 1.017                | 0.668                 | 0.258                 | -0.075                | -0.013                | 0.239                 |
| 14          | -0.557               | -0.623               | -0.903               | -0.709               | -0.706               | -0.164               | -0.685               | -0.131               | -0.911               | -1.588                | 0.268                 | -0.700                | 0.249                 | -2.783                |
| 15          | -0.565               | -1.285               | 0.364                | -0.880               | 0.021                | -0.771               | -0.657               | -1.505               | 0.994                | 1.243                 | 0.086                 | -0.760                | -0.671                | -1.535                |
| 16          | -0.279               | -0.029               | -0.849               | -0.855               | -0.891               | -0.086               | -0.498               | 0.080                | -0.993               | 1.502                 | 0.559                 | 2.802                 | -0.103                | -0.738                |
| 17          | -0.139               | -0.406               | -0.512               | -1.055               | 1.404                | -0.267               | -0.889               | -1.186               | -0.692               | 0.884                 | 0.944                 | -0.324                | -0.535                | -0.689                |
| 18          | -0.665               | -1.284               | -0.278               | 1.176                | 0.879                | -0.735               | 2.912                | -1.216               | -1.157               | -0.998                | 0.279                 | 0.807                 | 0.023                 | -0.191                |
| 19          | -0.729               | -0.511               | -0.466               | 0.657                | 0.723                | -0.844               | -0.009               | -0.693               | -0.297               | 1.065                 | 0.092                 | 0.441                 | 3.148                 | -1.199                |
| 20          | -0.369               | -0.341               | -0.354               | 1.363                | 1.399                | -0.215               | -0.132               | 0.116                | 1.412                | 1.032                 | 0.632                 | 0.289                 | -0.340                | -0.034                |
| 21          | -0.769               | -0.793               | 2.076                | 1.653                | 1.661                | 0.158                | -0.089               | 1.270                | 1.716                | 0.338                 | 0.690                 | -0.674                | 0.077                 | -0.233                |
| 22          | -0.319               | -0.022               | -0.880               | -1.114               | -1.356               | -0.400               | 1.295                | 1.239                | 2.471                | 0.455                 | 0.278                 | -0.557                | -0.115                | -0.457                |
| 23          | -0.023               | 0.628                | -1.062               | 1.051                | -0.752               | 0.139                | -0.411               | -0.417               | 2.487                | -1.243                | 0.647                 | 0.330                 | -0.449                | 0.865                 |
| 24          | 0.104                | -0.632               | -0.310               | 0.224                | 0.213                | 3.041                | -0.304               | 0.250                | 0.289                | -0.177                | -4.360                | -0.174                | 0.065                 | -0.250                |
| 25          | -0.887               | 2.715                | 1.755                | -0.786               | -0.972               | 0.754                | 1.666                | 0.014                | 0.333                | 0.354                 | 0.448                 | -0.980                | -0.038                | -0.249                |
| 26          | -0.504               | 3.288                | -0.605               | 0.355                | 0.214                | 0.460                | -0.975               | 0.044                | 0.322                | 0.259                 | -0.110                | -0.593                | -0.175                | -1.853                |
| 27          | 0.101                | 0.476                | 1.411                | -0.590               | -0.620               | 0.335                | -0.154               | 0.154                | 0.511                | 0.268                 | 0.116                 | 3.151                 | -0.063                | 0.524                 |
| 28          | 0.460                | 0.915                | -0.683               | -0.676               | 1.159                | -0.101               | 0.120                | -0.172               | 0.502                | -1.923                | -0.255                | 3.712                 | 0.055                 | 0.064                 |
| 29          | 0.309                | -0.094               | 1.679                | -0.711               | -0.383               | 0.160                | -0.655               | -0.890               | 0.199                | -2.608                | 0.208                 | -0.389                | -0.466                | -0.302                |
| 30          | 0.673                | 0.609                | -0.924               | 0.174                | 0.273                | -0.162               | -1.536               | -0.822               | 0.720                | -1.277                | -0.340                | -0.654                | -0.663                | -0.722                |
| 31          | 0.652                | -0.078               | 1.700                | 0.525                | 0.224                | 0.394                | -0.739               | 2.166                | -0.412               | -0.107                | 0.169                 | 0.262                 | -0.008                | -0.016                |
| 32          | 0.963                | 0.575                | -0.651               | 1.215                | 1.042                | 0.139                | -0.814               | 2.159                | 0.154                | 0.856                 | 0.259                 | 0.208                 | -0.451                | -0.478                |
| 33          | 1.208                | -0.387               | 1.445                | 1.427                | -0.711               | -0.143               | 0.232                | -0.685               | -0.997               | 0.270                 | -0.010                | -0.063                | -1.012                | 0.077                 |
| 34          | 1.500                | 0.421                | -0.849               | -1.403               | 1.683                | -0.712               | 0.234                | -0.915               | 0.603                | 1.159                 | 0.036                 | -0.368                | -0.737                | 1.137                 |
| 35          | 1.667                | -0.654               | 1.128                | -0.740               | -0.931               | -0.400               | -0.582               | -1.471               | -0.387               | 0.444                 | 0.351                 | -0.481                | -1.510                | 0.382                 |
| 36          | 1.984                | 0.022                | -1.078               | 1.278                | -1.215               | -0.730               | -0.101               | -0.863               | -0.573               | 0.576                 | -0.288                | -0.274                | -1.385                | -0.346                |
| 37          | 1.533                | -0.716               | 1.571                | -1.506               | 2.049                | -0.218               | 0.870                | 1.040                | -0.025               | -1.437                | 0.194                 | -0.522                | -0.048                | 0.001                 |
| 38          | 1.890                | 0.206                | -1.021               | 0.223                | 0.365                | -0.819               | 2.689                | 1.169                | -0.391               | 0.037                 | -0.862                | -0.434                | -0.924                | -0.538                |
| 39          | 1.015                | 0.576                | 1.176                | -0.883               | -0.818               | 0.077                | -0.353               | -0.710               | 0.154                | 0.622                 | 0.238                 | 0.145                 | 2.452                 | -0.083                |
| 40          | 1.453                | -0.165               | 1.116                | 2.087                | -1.366               | 0.238                | 0.153                | -0.244               | -1.001               | 0.381                 | 0.096                 | 0.274                 | 1.759                 | -0.569                |
| 41          | 1.851                | 0.336                | -1.287               | -0.577               | 0.185                | -0.030               | -0.399               | -0.350               | 0.394                | -0.402                | 0.125                 | -1.390                | 3.403                 | 2.198                 |
| 42          | 0.319                | -0.072               | -0.678               | -0.758               | -0.919               | -0.421               | -0.980               | 2.752                | -1.524               | 0.899                 | 0.118                 | -0.291                | -0.289                | 0.007                 |

**Table s2.** Value of descriptors used for Eqs. 4-14

| Cpd. | IC <sub>2</sub> | EP <sub>21</sub> | Q <sub>19</sub> | FEL <sub>2</sub> | Q <sub>25</sub> | I <sub>25</sub> | R <sub>1</sub> | EP <sub>22</sub> | EP <sub>23</sub> | S <sub>11</sub> | Q <sub>6</sub> | Q <sub>11</sub> |
|------|-----------------|------------------|-----------------|------------------|-----------------|-----------------|----------------|------------------|------------------|-----------------|----------------|-----------------|
| 1    | 4.119           | -0.004           | 0.574           | -0.010           | -0.082          | 0               | 7.249          | 0.133            | -0.272           | 12.102          | -0.193         | -0.510          |
| 2    | 4.363           | 0.093            | 0.569           | 0.004            | -0.196          | 1               | 7.253          | 0.071            | -0.261           | 12.122          | -0.197         | -0.505          |
| 3    | 4.302           | 0.304            | 0.625           | -0.006           | -0.172          | 0               | 7.253          | -0.006           | -0.253           | 12.125          | -0.188         | -0.515          |
| 4    | 4.162           | 0.017            | 0.566           | -0.007           | -0.141          | 0               | 7.253          | -0.062           | -0.202           | 12.140          | -0.187         | -0.520          |
| 5    | 4.219           | -0.052           | 0.570           | 0.019            | 0.070           | 0               | 7.253          | 0.144            | -0.253           | 12.134          | -0.183         | -0.500          |
| 6    | 4.372           | -0.024           | 0.567           | 0.001            | -0.143          | 1               | 7.260          | 0.175            | -0.250           | 12.134          | -0.208         | -0.471          |
| 7    | 4.372           | 0.022            | 0.610           | -0.002           | -0.001          | 0               | 7.260          | 0.107            | -0.260           | 12.134          | -0.188         | -0.512          |
| 8    | 4.363           | -0.061           | 0.616           | -0.004           | 0.252           | 0               | 7.268          | 0.163            | -0.270           | 12.099          | -0.207         | -0.478          |
| 9    | 4.363           | 0.039            | 0.588           | -0.011           | -0.189          | 0               | 7.268          | 0.091            | -0.257           | 12.099          | -0.184         | -0.499          |
| 10   | 4.376           | -0.030           | 0.611           | 0.004            | -0.294          | 1               | 7.266          | 0.122            | -0.265           | 12.136          | -0.209         | -0.477          |
| 11   | 4.376           | -0.028           | 0.598           | 0.003            | -0.001          | 0               | 7.266          | 0.144            | -0.274           | 12.136          | -0.170         | -0.488          |
| 12   | 4.316           | -0.052           | 0.568           | -0.008           | -0.124          | 0               | 7.268          | 0.113            | -0.257           | 12.142          | -0.194         | -0.496          |
| 13   | 4.363           | 0.083            | 0.566           | -0.006           | -0.249          | 1               | 7.242          | 0.031            | -0.251           | 12.130          | -0.186         | -0.514          |
| 14   | 4.440           | -0.072           | 0.547           | 0.016            | 0.333           | 0               | 7.266          | 0.212            | -0.260           | 12.151          | -0.184         | -0.498          |
| 15   | 4.481           | 0.075            | 0.527           | -0.007           | 0.006           | 0               | 7.247          | 0.092            | -0.248           | 12.161          | -0.192         | -0.516          |
| 16   | 4.357           | -0.007           | 0.583           | -0.006           | -0.205          | 1               | 7.270          | 0.144            | -0.244           | 12.162          | -0.190         | -0.516          |
| 17   | 4.478           | -0.005           | 0.562           | -0.007           | -0.031          | 0               | 7.268          | 0.073            | -0.247           | 12.169          | -0.186         | -0.518          |
| 18   | 4.323           | -0.035           | 0.547           | 0.006            | 0.029           | 0               | 7.255          | 0.155            | -0.258           | 12.155          | -0.223         | -0.492          |
| 19   | 4.431           | -0.010           | 0.580           | 0.004            | 0.020           | 0               | 7.261          | 0.121            | -0.257           | 12.147          | -0.196         | -0.509          |
| 20   | 4.416           | -0.007           | 0.581           | -0.002           | -0.324          | 1               | 7.269          | 0.089            | -0.247           | 12.168          | -0.195         | -0.516          |
| 21   | 4.361           | -0.126           | 0.578           | 0.006            | -0.217          | 1               | 7.246          | 0.095            | -0.271           | 12.167          | -0.189         | -0.514          |
| 22   | 4.375           | -0.192           | 0.628           | -0.002           | -0.307          | 1               | 7.270          | 0.150            | -0.263           | 12.174          | -0.200         | -0.474          |
| 23   | 4.449           | -0.058           | 0.589           | -0.006           | -0.268          | 1               | 7.285          | 0.109            | -0.251           | 12.176          | -0.185         | -0.492          |
| 24   | 4.534           | -0.162           | 0.637           | -0.006           | -0.214          | 1               | 7.265          | 0.150            | -0.283           | 12.159          | -0.241         | -0.478          |
| 25   | 4.470           | 0.021            | 0.626           | -0.003           | -0.212          | 1               | 7.264          | 0.048            | -0.271           | 12.126          | -0.212         | -0.474          |
| 26   | 4.524           | -0.078           | 0.604           | 0.004            | -0.230          | 1               | 7.287          | 0.151            | -0.259           | 12.132          | -0.172         | -0.485          |
| 27   | 4.509           | 0.014            | 0.639           | -0.004           | -0.320          | 1               | 7.266          | 0.061            | -0.265           | 12.199          | -0.185         | -0.512          |
| 28   | 4.560           | -0.032           | 0.662           | 0.007            | -0.344          | 1               | 7.290          | 0.105            | -0.254           | 12.206          | -0.183         | -0.486          |
| 29   | 4.609           | 0.135            | 0.635           | 0.011            | -0.262          | 1               | 7.264          | 0.020            | -0.261           | 12.207          | -0.194         | -0.494          |
| 30   | 4.620           | 0.000            | 0.634           | 0.004            | -0.255          | 1               | 7.287          | 0.127            | -0.268           | 12.214          | -0.169         | -0.487          |
| 31   | 4.477           | -0.019           | 0.664           | 0.005            | -0.298          | 1               | 7.267          | 0.062            | -0.289           | 12.238          | -0.194         | -0.507          |
| 32   | 4.490           | -0.151           | 0.631           | 0.005            | -0.288          | 1               | 7.291          | 0.187            | -0.283           | 12.244          | -0.187         | -0.516          |
| 33   | 4.621           | 0.042            | 0.597           | 0.000            | -0.290          | 1               | 7.270          | 0.066            | -0.293           | 12.266          | -0.199         | -0.517          |
| 34   | 4.633           | -0.055           | 0.646           | -0.010           | -0.269          | 1               | 7.294          | 0.173            | -0.295           | 12.273          | -0.197         | -0.511          |
| 35   | 4.656           | 0.023            | 0.581           | -0.005           | -0.296          | 1               | 7.273          | 0.072            | -0.292           | 12.291          | -0.183         | -0.517          |
| 36   | 4.668           | -0.069           | 0.634           | -0.001           | -0.300          | 1               | 7.297          | 0.145            | -0.279           | 12.297          | -0.195         | -0.516          |
| 37   | 4.472           | -0.020           | 0.639           | 0.015            | -0.295          | 1               | 7.274          | 0.066            | -0.297           | 12.293          | -0.195         | -0.478          |
| 38   | 4.487           | -0.136           | 0.651           | -0.001           | -0.255          | 1               | 7.297          | 0.200            | -0.304           | 12.299          | -0.241         | -0.484          |
| 39   | 4.704           | 0.018            | 0.596           | -0.006           | -0.285          | 1               | 7.275          | 0.060            | -0.274           | 12.250          | -0.198         | -0.513          |
| 40   | 4.609           | 0.067            | 0.594           | 0.012            | -0.320          | 1               | 7.278          | 0.015            | -0.274           | 12.280          | -0.196         | -0.509          |
| 41   | 4.621           | -0.015           | 0.634           | -0.018           | -0.290          | 1               | 7.302          | 0.108            | -0.266           | 12.286          | -0.230         | -0.479          |
| 42   | 4.302           | -0.164           | 0.615           | -0.007           | -0.077          | 0               | 7.274          | 0.197            | -0.296           | 12.210          | -0.190         | -0.519          |
| 43   | 4.374           | -0.032           | 0.532           | 0.007            | 0.018           | 0               | 7.265          | 0.137            | -0.239           | 12.142          | -0.186         | -0.518          |
| 44   | 4.386           | 0.001            | 0.577           | 0.009            | -0.173          | 1               | 7.304          | 0.121            | -0.247           | 12.123          | -0.189         | -0.491          |
| 45   | 4.219           | -0.008           | 0.556           | -0.007           | -0.103          | 0               | 7.253          | 0.086            | -0.251           | 12.134          | -0.190         | -0.518          |
| 46   | 4.162           | -0.195           | 0.631           | 0.004            | -0.072          | 0               | 7.253          | 0.170            | -0.278           | 12.140          | -0.201         | -0.475          |
| 47   | 4.475           | -0.178           | 0.571           | -0.004           | -0.067          | 0               | 7.287          | 0.190            | -0.275           | 12.188          | -0.187         | -0.515          |
| 48   | 4.172           | -0.245           | 0.574           | 0.018            | 0.083           | 0               | 7.257          | 0.185            | -0.256           | 12.172          | -0.185         | -0.495          |
| 49   | 4.374           | -0.082           | 0.642           | -0.009           | -0.001          | 0               | 7.277          | 0.138            | -0.256           | 12.204          | -0.169         | -0.482          |
| 50   | 4.388           | -0.188           | 0.646           | 0.005            | -0.199          | 1               | 7.365          | 0.187            | -0.270           | 12.148          | -0.184         | -0.491          |
| 51   | 4.534           | -0.181           | 0.618           | -0.003           | -0.215          | 1               | 7.265          | 0.158            | -0.293           | 12.159          | -0.160         | -0.479          |



**Table s4a.** Observed (Obs), calculated (Calc), residual (Res), predicted residual (Presss) and LOO predicted (Pred) activities of Eqs. 3 and 5

| Cpd       | Obs   | Eq. 3 |        |        |       | Eq. 5 |        |        |       |
|-----------|-------|-------|--------|--------|-------|-------|--------|--------|-------|
|           |       | Calc  | Res    | Presss | Pred  | Calc  | Res    | Press  | Pred  |
| <b>1</b>  | 4.886 | 4.535 | 0.351  | 0.484  | 4.402 | 5.203 | -0.317 | -0.324 | 5.210 |
| <b>3</b>  | 4.678 | 5.200 | -0.522 | -0.624 | 5.302 | 4.859 | -0.181 | -0.522 | 5.200 |
| <b>4</b>  | 4.638 | 5.133 | -0.495 | -0.572 | 5.210 | 4.686 | -0.048 | 0.103  | 4.535 |
| <b>5</b>  | 5.699 | 5.616 | 0.083  | 0.096  | 5.603 | 5.771 | -0.072 | -0.108 | 5.807 |
| <b>6</b>  | 6.027 | 5.789 | 0.238  | 0.260  | 5.767 | 6.564 | -0.537 | -0.116 | 6.143 |
| <b>7</b>  | 5.495 | 5.516 | -0.021 | -0.023 | 5.518 | 5.402 | 0.093  | 0.021  | 5.474 |
| <b>10</b> | 6.886 | 6.076 | 0.810  | 0.884  | 6.002 | 6.262 | 0.624  | 0.400  | 6.486 |
| <b>11</b> | 6.387 | 5.931 | 0.456  | 0.480  | 5.907 | 6.129 | 0.258  | 0.559  | 5.828 |
| <b>12</b> | 5.284 | 5.392 | -0.108 | -0.130 | 5.414 | 5.548 | -0.264 | -0.232 | 5.516 |
| <b>13</b> | 5.886 | 5.757 | 0.129  | 0.147  | 5.739 | 5.846 | 0.040  | 0.491  | 5.395 |
| <b>14</b> | 6.076 | 6.315 | -0.239 | -0.337 | 6.413 | 6.157 | -0.081 | -0.023 | 6.099 |
| <b>16</b> | 5.886 | 6.019 | -0.133 | -0.145 | 6.031 | 6.431 | -0.545 | -0.287 | 6.173 |
| <b>17</b> | 5.469 | 6.106 | -0.637 | -0.678 | 6.147 | 5.480 | -0.011 | 0.065  | 5.404 |
| <b>18</b> | 5.553 | 5.380 | 0.173  | 0.198  | 5.355 | 5.365 | 0.188  | 0.013  | 5.540 |
| <b>19</b> | 5.699 | 5.984 | -0.285 | -0.316 | 6.015 | 5.446 | 0.253  | 0.080  | 5.619 |
| <b>20</b> | 5.721 | 6.393 | -0.672 | -0.780 | 6.501 | 6.174 | -0.453 | -0.596 | 6.317 |
| <b>21</b> | 6.292 | 6.215 | 0.077  | 0.102  | 6.190 | 6.315 | -0.023 | 0.187  | 6.105 |
| <b>23</b> | 6.569 | 6.827 | -0.258 | -0.356 | 6.925 | 6.748 | -0.179 | -0.013 | 6.582 |
| <b>25</b> | 6.041 | 6.378 | -0.337 | -0.527 | 6.568 | 5.903 | 0.138  | -0.334 | 6.375 |
| <b>26</b> | 7.208 | 7.127 | 0.081  | 0.157  | 7.051 | 6.908 | 0.300  | 0.288  | 6.920 |
| <b>28</b> | 7.066 | 6.823 | 0.243  | 0.261  | 6.805 | 7.043 | 0.023  | -0.013 | 7.079 |
| <b>29</b> | 7.229 | 6.570 | 0.659  | 0.687  | 6.542 | 6.446 | 0.783  | 0.701  | 6.528 |
| <b>30</b> | 7.337 | 7.164 | 0.173  | 0.191  | 7.146 | 7.414 | -0.077 | 0.304  | 7.033 |
| <b>32</b> | 7.553 | 7.108 | 0.445  | 0.480  | 7.073 | 7.225 | 0.328  | 0.249  | 7.304 |
| <b>33</b> | 6.959 | 6.617 | 0.342  | 0.384  | 6.575 | 6.688 | 0.271  | 0.188  | 6.771 |
| <b>34</b> | 7.509 | 7.095 | 0.414  | 0.487  | 7.022 | 7.266 | 0.243  | 0.458  | 7.051 |
| <b>36</b> | 7.237 | 7.377 | -0.140 | -0.167 | 7.404 | 7.312 | -0.075 | -0.034 | 7.271 |
| <b>37</b> | 6.678 | 7.042 | -0.364 | -0.421 | 7.099 | 7.393 | -0.715 | -0.804 | 7.482 |
| <b>38</b> | 7.097 | 7.455 | -0.358 | -0.421 | 7.518 | 7.105 | -0.008 | -0.527 | 7.624 |
| <b>40</b> | 6.678 | 6.971 | -0.293 | -0.336 | 7.014 | 6.722 | -0.044 | -0.479 | 7.157 |
| <b>41</b> | 6.796 | 6.948 | -0.152 | -0.211 | 7.007 | 6.889 | -0.093 | -0.039 | 6.835 |
| <b>42</b> | 6.357 | 6.019 | 0.338  | 0.393  | 5.964 | 6.175 | 0.182  | 0.390  | 5.967 |

**Table s4b.** Observed (Obs), calculated (Calc), residual (Res), predicted residual (Press) and LOO predicted (Pred) activities of Eqs. 6 and 7

| Cpd       | Obs   | Eq. 6 |        |        |       | Eq. 7 |        |        |       |
|-----------|-------|-------|--------|--------|-------|-------|--------|--------|-------|
|           |       | Calc  | Res    | Press  | Pred  | Calc  | Res    | Press  | Pred  |
| <b>1</b>  | 4.886 | 5.136 | -0.250 | -0.324 | 5.210 | 4.731 | 0.155  | 0.202  | 4.684 |
| <b>3</b>  | 4.678 | 5.141 | -0.463 | -0.522 | 5.200 | 4.726 | -0.048 | -0.117 | 4.795 |
| <b>4</b>  | 4.638 | 4.573 | 0.065  | 0.103  | 4.535 | 4.864 | -0.226 | -0.280 | 4.918 |
| <b>5</b>  | 5.699 | 5.780 | -0.081 | -0.108 | 5.807 | 5.651 | 0.048  | 0.068  | 5.631 |
| <b>6</b>  | 6.027 | 6.130 | -0.103 | -0.116 | 6.143 | 5.868 | 0.159  | 0.173  | 5.854 |
| <b>7</b>  | 5.495 | 5.476 | 0.019  | 0.021  | 5.474 | 5.760 | -0.265 | -0.313 | 5.808 |
| <b>10</b> | 6.886 | 6.515 | 0.371  | 0.400  | 6.486 | 6.393 | 0.493  | 0.554  | 6.332 |
| <b>11</b> | 6.387 | 5.890 | 0.497  | 0.559  | 5.828 | 5.973 | 0.414  | 0.456  | 5.931 |
| <b>12</b> | 5.284 | 5.490 | -0.206 | -0.232 | 5.516 | 5.602 | -0.318 | -0.357 | 5.641 |
| <b>13</b> | 5.886 | 5.540 | 0.346  | 0.491  | 5.395 | 5.435 | 0.451  | 0.548  | 5.338 |
| <b>14</b> | 6.076 | 6.094 | -0.018 | -0.023 | 6.099 | 5.974 | 0.102  | 0.214  | 5.862 |
| <b>16</b> | 5.886 | 6.138 | -0.252 | -0.287 | 6.173 | 5.781 | 0.105  | 0.113  | 5.773 |
| <b>17</b> | 5.469 | 5.412 | 0.057  | 0.065  | 5.404 | 5.857 | -0.388 | -0.482 | 5.951 |
| <b>18</b> | 5.553 | 5.542 | 0.011  | 0.013  | 5.540 | 5.569 | -0.016 | -0.018 | 5.571 |
| <b>19</b> | 5.699 | 5.626 | 0.073  | 0.080  | 5.619 | 5.991 | -0.292 | -0.324 | 6.023 |
| <b>20</b> | 5.721 | 6.259 | -0.538 | -0.596 | 6.317 | 6.177 | -0.456 | -0.533 | 6.254 |
| <b>21</b> | 6.292 | 6.149 | 0.143  | 0.187  | 6.105 | 6.445 | -0.153 | -0.184 | 6.476 |
| <b>23</b> | 6.569 | 6.581 | -0.012 | -0.013 | 6.582 | 6.374 | 0.195  | 0.215  | 6.354 |
| <b>25</b> | 6.041 | 6.341 | -0.300 | -0.334 | 6.375 | 6.371 | -0.330 | -0.354 | 6.395 |
| <b>26</b> | 7.208 | 6.950 | 0.258  | 0.288  | 6.920 | 6.930 | 0.278  | 0.299  | 6.909 |
| <b>28</b> | 7.066 | 7.077 | -0.011 | -0.013 | 7.079 | 7.425 | -0.359 | -0.442 | 7.508 |
| <b>29</b> | 7.229 | 6.610 | 0.619  | 0.701  | 6.528 | 6.825 | 0.404  | 0.536  | 6.693 |
| <b>30</b> | 7.337 | 7.058 | 0.279  | 0.304  | 7.033 | 7.175 | 0.162  | 0.180  | 7.157 |
| <b>32</b> | 7.553 | 7.329 | 0.224  | 0.249  | 7.304 | 7.319 | 0.234  | 0.279  | 7.274 |
| <b>33</b> | 6.959 | 6.797 | 0.162  | 0.188  | 6.771 | 6.769 | 0.190  | 0.226  | 6.733 |
| <b>34</b> | 7.509 | 7.136 | 0.373  | 0.458  | 7.051 | 7.200 | 0.309  | 0.386  | 7.123 |
| <b>36</b> | 7.237 | 7.267 | -0.030 | -0.034 | 7.271 | 7.516 | -0.279 | -0.323 | 7.560 |
| <b>37</b> | 6.678 | 7.321 | -0.643 | -0.804 | 7.482 | 7.058 | -0.380 | -0.486 | 7.164 |
| <b>38</b> | 7.097 | 7.529 | -0.432 | -0.527 | 7.624 | 7.212 | -0.115 | -0.141 | 7.238 |
| <b>40</b> | 6.678 | 7.105 | -0.427 | -0.479 | 7.157 | 6.896 | -0.218 | -0.295 | 6.973 |
| <b>41</b> | 6.796 | 6.824 | -0.028 | -0.039 | 6.835 | 6.811 | -0.015 | -0.021 | 6.817 |
| <b>42</b> | 6.357 | 6.062 | 0.295  | 0.390  | 5.967 | 6.198 | 0.159  | 0.212  | 6.145 |

**Table s4c.** Observed (Obs), calculated (Calc), residual (Res), predicted residual (Press) and LOO predicted (Pred) activities of Eqs. 8 and 9

| Cpd | Obs   | Eq. 8 |        |        |       | Eq. 9 |        |        |       |
|-----|-------|-------|--------|--------|-------|-------|--------|--------|-------|
|     |       | Calc  | Res    | Press  | Pred  | Calc  | Res    | Press  | Pred  |
| 2   | 5.959 | 6.286 | -0.327 | -0.366 | 6.325 | 5.663 | 0.296  | 0.339  | 5.620 |
| 3   | 4.678 | 5.188 | -0.510 | -0.580 | 5.258 | 4.804 | -0.126 | -0.293 | 4.971 |
| 4   | 4.638 | 4.619 | 0.019  | 0.029  | 4.609 | 4.845 | -0.207 | -0.276 | 4.914 |
| 5   | 5.699 | 5.712 | -0.013 | -0.021 | 5.720 | 5.742 | -0.043 | -0.068 | 5.767 |
| 6   | 6.027 | 6.243 | -0.216 | -0.239 | 6.266 | 5.874 | 0.153  | 0.165  | 5.862 |
| 8   | 5.721 | 5.703 | 0.018  | 0.020  | 5.701 | 5.587 | 0.134  | 0.311  | 5.410 |
| 9   | 5.125 | 5.413 | -0.288 | -0.333 | 5.458 | 5.494 | -0.369 | -0.417 | 5.542 |
| 10  | 6.886 | 6.589 | 0.297  | 0.317  | 6.569 | 6.409 | 0.477  | 0.526  | 6.360 |
| 12  | 5.284 | 5.484 | -0.200 | -0.226 | 5.510 | 5.532 | -0.248 | -0.279 | 5.563 |
| 13  | 5.886 | 5.758 | 0.128  | 0.172  | 5.714 | 5.471 | 0.415  | 0.484  | 5.402 |
| 15  | 5.538 | 4.981 | 0.557  | 0.657  | 4.881 | 5.332 | 0.206  | 0.289  | 5.249 |
| 17  | 5.469 | 5.400 | 0.069  | 0.078  | 5.391 | 5.796 | -0.327 | -0.382 | 5.851 |
| 18  | 5.553 | 5.527 | 0.026  | 0.030  | 5.523 | 5.597 | -0.044 | -0.054 | 5.607 |
| 20  | 5.721 | 6.344 | -0.623 | -0.695 | 6.416 | 6.198 | -0.477 | -0.543 | 6.264 |
| 21  | 6.292 | 6.299 | -0.007 | -0.008 | 6.300 | 6.444 | -0.152 | -0.180 | 6.472 |
| 22  | 7.222 | 6.510 | 0.712  | 0.753  | 6.469 | 6.811 | 0.411  | 0.514  | 6.708 |
| 23  | 6.569 | 6.618 | -0.049 | -0.057 | 6.626 | 6.318 | 0.251  | 0.273  | 6.296 |
| 24  | 6.244 | 6.543 | -0.299 | -0.342 | 6.586 | 7.049 | -0.805 | -0.933 | 7.177 |
| 25  | 6.041 | 6.459 | -0.418 | -0.451 | 6.492 | 6.320 | -0.279 | -0.297 | 6.338 |
| 27  | 6.420 | 6.427 | -0.007 | -0.007 | 6.427 | 6.660 | -0.240 | -0.261 | 6.681 |
| 28  | 7.066 | 7.033 | 0.033  | 0.044  | 7.022 | 7.414 | -0.348 | -0.411 | 7.477 |
| 29  | 7.229 | 6.659 | 0.570  | 0.656  | 6.573 | 6.933 | 0.296  | 0.421  | 6.808 |
| 31  | 7.357 | 6.897 | 0.460  | 0.515  | 6.842 | 7.004 | 0.353  | 0.413  | 6.944 |
| 32  | 7.553 | 7.299 | 0.254  | 0.294  | 7.259 | 7.253 | 0.300  | 0.342  | 7.211 |
| 34  | 7.509 | 7.166 | 0.343  | 0.411  | 7.098 | 7.044 | 0.465  | 0.546  | 6.963 |
| 35  | 6.699 | 6.814 | -0.115 | -0.131 | 6.830 | 6.735 | -0.036 | -0.045 | 6.744 |
| 36  | 7.237 | 7.239 | -0.002 | -0.003 | 7.240 | 7.434 | -0.197 | -0.227 | 7.464 |
| 37  | 6.678 | 7.318 | -0.640 | -0.826 | 7.504 | 7.124 | -0.446 | -0.553 | 7.231 |
| 38  | 7.097 | 7.505 | -0.408 | -0.496 | 7.593 | 7.081 | 0.016  | 0.018  | 7.079 |
| 39  | 7.027 | 6.659 | 0.368  | 0.392  | 6.635 | 6.954 | 0.073  | 0.092  | 6.935 |
| 41  | 6.796 | 6.852 | -0.056 | -0.079 | 6.875 | 6.633 | 0.163  | 0.210  | 6.586 |
| 42  | 6.357 | 6.034 | 0.323  | 0.444  | 5.913 | 6.024 | 0.333  | 0.417  | 5.940 |

**Table s4d.** Observed (Obs), calculated (Calc), residual (Res), predicted residual (Press) and LOO predicted (Pred) activities of Eqs. 10-12

| Cpd | Obs   | Eq. 10 |        |        |       | Eq. 11 |        |        |       | Eq. 12 |        |        |       |
|-----|-------|--------|--------|--------|-------|--------|--------|--------|-------|--------|--------|--------|-------|
|     |       | Calc   | Res    | Press  | Pred  | Calc   | Res    | Press  | Pred  | Calc   | Res    | Press  | Pred  |
| 1   | 4.886 | 5.213  | -0.327 | -0.420 | 5.306 | 5.101  | -0.215 | -0.252 | 5.138 | 4.656  | 0.230  | 0.316  | 4.570 |
| 2   | 5.959 | 6.258  | -0.299 | -0.351 | 6.310 | 5.790  | 0.169  | 0.219  | 5.740 | 5.677  | 0.282  | 0.342  | 5.617 |
| 4   | 4.638 | 4.424  | 0.214  | 0.385  | 4.253 | 4.868  | -0.230 | -0.433 | 5.071 | 4.822  | -0.184 | -0.239 | 4.877 |
| 6   | 6.027 | 6.179  | -0.152 | -0.173 | 6.200 | 6.616  | -0.589 | -0.748 | 6.775 | 5.852  | 0.175  | 0.188  | 5.839 |
| 7   | 5.495 | 5.539  | -0.044 | -0.048 | 5.543 | 5.366  | 0.129  | 0.145  | 5.350 | 5.790  | -0.295 | -0.347 | 5.842 |
| 8   | 5.721 | 5.809  | -0.088 | -0.100 | 5.821 | 5.515  | 0.206  | 0.254  | 5.467 | 5.723  | -0.002 | -0.004 | 5.725 |
| 9   | 5.125 | 5.415  | -0.290 | -0.338 | 5.463 | 5.333  | -0.208 | -0.240 | 5.365 | 5.517  | -0.392 | -0.452 | 5.577 |
| 11  | 6.387 | 6.016  | 0.371  | 0.436  | 5.951 | 6.206  | 0.181  | 0.241  | 6.146 | 5.985  | 0.402  | 0.439  | 5.948 |
| 12  | 5.284 | 5.515  | -0.231 | -0.262 | 5.546 | 5.638  | -0.354 | -0.394 | 5.678 | 5.505  | -0.221 | -0.246 | 5.530 |
| 14  | 6.076 | 6.228  | -0.152 | -0.222 | 6.298 | 6.075  | 0.001  | 0.001  | 6.075 | 6.066  | 0.010  | 0.020  | 6.056 |
| 15  | 5.538 | 4.909  | 0.629  | 0.753  | 4.785 | 5.411  | 0.127  | 0.146  | 5.392 | 5.377  | 0.161  | 0.230  | 5.308 |
| 16  | 5.886 | 6.135  | -0.249 | -0.288 | 6.174 | 6.218  | -0.332 | -0.437 | 6.323 | 5.733  | 0.153  | 0.165  | 5.721 |
| 18  | 5.553 | 5.632  | -0.079 | -0.090 | 5.643 | 5.459  | 0.094  | 0.123  | 5.430 | 5.591  | -0.038 | -0.045 | 5.598 |
| 19  | 5.699 | 5.703  | -0.004 | -0.004 | 5.703 | 5.431  | 0.268  | 0.301  | 5.398 | 6.032  | -0.333 | -0.364 | 6.063 |
| 20  | 5.721 | 6.285  | -0.564 | -0.630 | 6.351 | 6.064  | -0.343 | -0.407 | 6.128 | 6.151  | -0.430 | -0.484 | 6.205 |
| 21  | 6.292 | 6.295  | -0.003 | -0.004 | 6.296 | 6.203  | 0.089  | 0.103  | 6.189 | 6.360  | -0.068 | -0.090 | 6.382 |
| 22  | 7.222 | 6.496  | 0.726  | 0.771  | 6.451 | 6.961  | 0.261  | 0.306  | 6.916 | 6.730  | 0.492  | 0.713  | 6.509 |
| 23  | 6.569 | 6.596  | -0.027 | -0.031 | 6.600 | 6.789  | -0.220 | -0.241 | 6.810 | 6.281  | 0.288  | 0.316  | 6.253 |
| 24  | 6.244 | 6.541  | -0.297 | -0.343 | 6.587 | 6.086  | 0.158  | 0.260  | 5.984 | 7.043  | -0.799 | -1.037 | 7.281 |
| 26  | 7.208 | 7.029  | 0.179  | 0.207  | 7.001 | 6.866  | 0.342  | 0.449  | 6.759 | 6.887  | 0.321  | 0.356  | 6.852 |
| 27  | 6.420 | 6.395  | 0.025  | 0.027  | 6.393 | 6.501  | -0.081 | -0.089 | 6.509 | 6.699  | -0.279 | -0.312 | 6.732 |
| 28  | 7.066 | 7.154  | -0.088 | -0.113 | 7.179 | 7.173  | -0.107 | -0.123 | 7.189 | 7.448  | -0.382 | -0.481 | 7.547 |
| 29  | 7.229 | 6.735  | 0.494  | 0.575  | 6.654 | 6.664  | 0.565  | 0.695  | 6.534 | 7.042  | 0.187  | 0.283  | 6.946 |
| 30  | 7.337 | 7.170  | 0.167  | 0.190  | 7.147 | 7.500  | -0.163 | -0.214 | 7.551 | 7.216  | 0.121  | 0.135  | 7.202 |
| 31  | 7.357 | 7.024  | 0.333  | 0.383  | 6.974 | 6.766  | 0.591  | 0.640  | 6.717 | 7.051  | 0.306  | 0.395  | 6.962 |
| 33  | 6.959 | 6.982  | -0.023 | -0.026 | 6.985 | 6.744  | 0.215  | 0.249  | 6.710 | 6.817  | 0.142  | 0.159  | 6.800 |
| 34  | 7.509 | 7.277  | 0.232  | 0.307  | 7.202 | 7.202  | 0.307  | 0.437  | 7.072 | 7.095  | 0.414  | 0.510  | 6.999 |
| 35  | 6.699 | 6.879  | -0.180 | -0.208 | 6.907 | 7.232  | -0.533 | -0.670 | 7.369 | 6.744  | -0.045 | -0.055 | 6.754 |
| 39  | 7.027 | 6.672  | 0.355  | 0.382  | 6.645 | 6.691  | 0.336  | 0.374  | 6.653 | 6.985  | 0.042  | 0.052  | 6.975 |
| 40  | 6.678 | 7.271  | -0.593 | -0.707 | 7.385 | 6.931  | -0.253 | -0.314 | 6.992 | 7.043  | -0.365 | -0.472 | 7.150 |
| 41  | 6.796 | 6.833  | -0.037 | -0.057 | 6.853 | 7.206  | -0.410 | -0.660 | 7.456 | 6.688  | 0.108  | 0.152  | 6.644 |

**Table s4e.** Observed (Obs), calculated (Calc), residual (Res), predicted residual (Press) and LOO predicted (Pred) activities of Eqs.13 and 14

| Cpd | Obs   | Eq. 13 |        |        |       | Eq. 14 |        |        |       |
|-----|-------|--------|--------|--------|-------|--------|--------|--------|-------|
|     |       | Calc   | Res    | Press  | Pred  | Calc   | Res    | Press  | Pred  |
| 1   | 4.886 | 4.722  | 0.164  | 0.205  | 4.681 | 5.236  | -0.350 | -0.391 | 5.277 |
| 2   | 5.959 | 5.659  | 0.300  | 0.335  | 5.624 | 5.932  | 0.027  | 0.031  | 5.928 |
| 3   | 4.678 | 4.793  | -0.115 | -0.228 | 4.906 | 4.876  | -0.198 | -0.238 | 4.916 |
| 4   | 4.638 | 4.888  | -0.250 | -0.299 | 4.937 | 4.697  | -0.059 | -0.083 | 4.721 |
| 5   | 5.699 | 5.761  | -0.062 | -0.082 | 5.781 | 5.770  | -0.071 | -0.078 | 5.777 |
| 6   | 6.027 | 5.894  | 0.133  | 0.141  | 5.886 | 6.672  | -0.645 | -0.761 | 6.788 |
| 7   | 5.495 | 5.725  | -0.230 | -0.255 | 5.750 | 5.410  | 0.085  | 0.091  | 5.404 |
| 8   | 5.721 | 5.639  | 0.082  | 0.127  | 5.594 | 5.500  | 0.221  | 0.260  | 5.461 |
| 9   | 5.125 | 5.522  | -0.397 | -0.433 | 5.558 | 5.315  | -0.190 | -0.209 | 5.334 |
| 10  | 6.886 | 6.424  | 0.462  | 0.501  | 6.385 | 6.373  | 0.513  | 0.579  | 6.307 |
| 11  | 6.387 | 5.959  | 0.428  | 0.456  | 5.931 | 6.104  | 0.283  | 0.353  | 6.034 |
| 12  | 5.284 | 5.574  | -0.290 | -0.317 | 5.601 | 5.576  | -0.292 | -0.316 | 5.600 |
| 13  | 5.886 | 5.481  | 0.405  | 0.457  | 5.429 | 5.893  | -0.007 | -0.008 | 5.894 |
| 14  | 6.076 | 6.004  | 0.072  | 0.122  | 5.954 | 6.151  | -0.075 | -0.088 | 6.164 |
| 15  | 5.538 | 5.338  | 0.200  | 0.257  | 5.281 | 5.421  | 0.117  | 0.128  | 5.410 |
| 16  | 5.886 | 5.773  | 0.113  | 0.120  | 5.766 | 6.469  | -0.583 | -0.694 | 6.580 |
| 17  | 5.469 | 5.818  | -0.349 | -0.390 | 5.859 | 5.470  | -0.001 | -0.001 | 5.470 |
| 18  | 5.553 | 5.619  | -0.066 | -0.074 | 5.627 | 5.456  | 0.097  | 0.117  | 5.436 |
| 19  | 5.699 | 5.995  | -0.296 | -0.319 | 6.018 | 5.469  | 0.230  | 0.249  | 5.450 |
| 20  | 5.721 | 6.210  | -0.489 | -0.540 | 6.261 | 6.223  | -0.502 | -0.567 | 6.288 |
| 21  | 6.292 | 6.472  | -0.180 | -0.209 | 6.501 | 6.351  | -0.059 | -0.065 | 6.357 |
| 22  | 7.222 | 6.862  | 0.360  | 0.435  | 6.787 | 6.919  | 0.303  | 0.338  | 6.884 |
| 23  | 6.569 | 6.344  | 0.225  | 0.241  | 6.328 | 6.780  | -0.211 | -0.226 | 6.795 |
| 24  | 6.244 | 7.092  | -0.848 | -0.974 | 7.218 | 6.165  | 0.079  | 0.109  | 6.135 |
| 25  | 6.041 | 6.335  | -0.294 | -0.310 | 6.351 | 6.028  | 0.013  | 0.016  | 6.025 |
| 26  | 7.208 | 6.916  | 0.292  | 0.309  | 6.899 | 6.927  | 0.281  | 0.350  | 6.858 |
| 27  | 6.420 | 6.670  | -0.250 | -0.268 | 6.688 | 6.519  | -0.099 | -0.106 | 6.526 |
| 28  | 7.066 | 7.414  | -0.348 | -0.400 | 7.466 | 7.063  | 0.003  | 0.004  | 7.062 |
| 29  | 7.229 | 6.897  | 0.332  | 0.420  | 6.809 | 6.491  | 0.738  | 0.826  | 6.403 |
| 30  | 7.337 | 7.156  | 0.181  | 0.197  | 7.140 | 7.395  | -0.058 | -0.072 | 7.409 |
| 31  | 7.357 | 7.013  | 0.344  | 0.397  | 6.960 | 6.701  | 0.656  | 0.698  | 6.659 |
| 32  | 7.553 | 7.279  | 0.274  | 0.308  | 7.245 | 7.222  | 0.331  | 0.396  | 7.157 |
| 33  | 6.959 | 6.778  | 0.181  | 0.199  | 6.760 | 6.713  | 0.246  | 0.273  | 6.686 |
| 34  | 7.509 | 7.067  | 0.442  | 0.512  | 6.997 | 7.279  | 0.230  | 0.264  | 7.245 |
| 35  | 6.699 | 6.729  | -0.030 | -0.035 | 6.734 | 7.143  | -0.444 | -0.512 | 7.211 |
| 36  | 7.237 | 7.441  | -0.204 | -0.226 | 7.463 | 7.308  | -0.071 | -0.083 | 7.320 |
| 37  | 6.678 | 7.118  | -0.440 | -0.524 | 7.202 | 7.413  | -0.735 | -1.016 | 7.694 |
| 38  | 7.097 | 7.117  | -0.020 | -0.022 | 7.119 | 7.224  | -0.127 | -0.184 | 7.281 |
| 39  | 7.027 | 6.947  | 0.080  | 0.095  | 6.932 | 6.649  | 0.378  | 0.410  | 6.617 |
| 40  | 6.678 | 6.995  | -0.317 | -0.386 | 7.064 | 6.739  | -0.061 | -0.072 | 6.750 |
| 41  | 6.796 | 6.660  | 0.136  | 0.170  | 6.626 | 6.993  | -0.197 | -0.253 | 7.049 |
| 42  | 6.357 | 6.089  | 0.268  | 0.316  | 6.041 | 6.154  | 0.203  | 0.251  | 6.106 |



**Table s5a.** *t*-values and *p*-values of Eqs. 3 and 5-12

| Eq. 3  | Parameter       | <i>t</i> -value | <i>p</i> -value | Eq. 5  | Parameter | <i>t</i> -value | <i>p</i> -value | Eq. 6  | Parameter | <i>t</i> -value | <i>p</i> -value |
|--------|-----------------|-----------------|-----------------|--------|-----------|-----------------|-----------------|--------|-----------|-----------------|-----------------|
|        | Intercept       | 88.08988        | 0.000000        |        | Intercept | -4.78029        | 0.000060        |        | Intercept | -5.18497        | 0.000019        |
|        | f <sub>1</sub>  | 8.15859         | 0.000000        |        | I25       | 4.80737         | 0.000056        |        | R1        | 5.21984         | 0.000017        |
|        | f <sub>2</sub>  | 2.18908         | 0.037414        |        | EP22      | 3.86627         | 0.000662        |        | I25       | 4.95096         | 0.000035        |
|        | f <sub>14</sub> | -3.70216        | 0.000968        |        | S11       | 5.40998         | 0.000011        |        | FEL2      | 3.56478         | 0.001382        |
|        | f <sub>9</sub>  | 3.16806         | 0.003791        |        | Q6        | 3.76823         | 0.000853        |        | EP23      | -3.06877        | 0.004851        |
|        |                 |                 |                 |        | Q11       | 2.40933         | 0.023360        |        |           |                 |                 |
| Eq. 7  | Parameter       | <i>t</i> -value | <i>p</i> -value | Eq. 8  | Parameter | <i>t</i> -value | <i>p</i> -value | Eq. 9  | Parameter | <i>t</i> -value | <i>p</i> -value |
|        | Intercept       | -5.82567        | 0.000004        |        | Intercept | -3.76134        | 0.000829        |        | Intercept | -4.48179        | 0.000132        |
|        | IC2             | 6.45338         | 0.000001        |        | I25       | 5.06904         | 0.000025        |        | IC2       | 5.43210         | 0.000011        |
|        | EP21            | -5.52908        | 0.000008        |        | R1        | 3.79168         | 0.000766        |        | EP21      | -4.52289        | 0.000118        |
|        | Q19             | 2.49887         | 0.019106        |        | EP23      | -2.66271        | 0.012903        |        | FEL2      | 3.37919         | 0.002302        |
|        | FEL2            | 3.00884         | 0.005760        |        | FEL2      | 2.33466         | 0.027246        |        | Q19       | 2.26703         | 0.031937        |
|        | Q25             | -2.09400        | 0.046156        |        |           |                 |                 | Q25    | -2.14030  | 0.041881        |                 |
| Eq. 10 | Parameter       | <i>t</i> -value | <i>p</i> -value | Eq. 11 | Parameter | <i>t</i> -value | <i>p</i> -value | Eq. 12 | Parameter | <i>t</i> -value | <i>p</i> -value |
|        | Intercept       | -4.42185        | 0.000155        |        | Intercept | -4.91615        | 0.000046        |        | Intercept | -5.53135        | 0.000009        |
|        | I25             | 4.64914         | 0.000085        |        | I25       | 3.89261         | 0.000652        |        | IC2       | 6.26244         | 0.000001        |
|        | EP23            | -3.71942        | 0.000968        |        | S11       | 5.75452         | 0.000005        |        | Q19       | 2.64987         | 0.013761        |
|        | R1              | 4.46042         | 0.000140        |        | Q11       | 3.56120         | 0.001514        |        | FEL2      | 3.27494         | 0.003091        |
|        | FEL2            | 3.57937         | 0.001386        |        | Q6        | 3.87437         | 0.000684        |        | EP21      | -2.69223        | 0.012481        |
|        |                 |                 |                 |        | EP22      | 1.73989         | 0.094178        |        | Q25       | -2.04774        | 0.051229        |

**Table s5b.** *t*-values and *p*-values of Eqs. 13 and 14

| Eq. 13 | Parameter | <i>t</i> -value | <i>p</i> -value | Eq. 14 | Parameter | <i>t</i> -value | <i>p</i> -value |
|--------|-----------|-----------------|-----------------|--------|-----------|-----------------|-----------------|
|        | Intercept | -5.55837        | 0.000003        |        | Intercept | -5.28662        | 0.000006        |
|        | IC2       | 7.10315         | 0.000000        |        | I25       | 5.72366         | 0.000002        |
|        | EP21      | -5.26596        | 0.000007        |        | S11       | 5.99347         | 0.000001        |
|        | Q19       | 2.66273         | 0.011515        |        | EP22      | 3.97332         | 0.000326        |
|        | FEL2      | 4.02416         | 0.000281        |        | Q6        | 3.83267         | 0.000490        |
|        | Q25       | -2.88244        | 0.006616        |        | Q11       | 2.75366         | 0.009179        |

**Table s6.** Dataset division of kNN-MFA statistical analysis

|                     | Total number of compounds | Compound numbers                            | <b>pIC<sub>50</sub> (M)</b> |        |        |        |          |
|---------------------|---------------------------|---------------------------------------------|-----------------------------|--------|--------|--------|----------|
|                     |                           |                                             | Average                     | Max    | Min    | StdDev | Sum      |
| <b>Training set</b> | 8                         | 3, 9, 12, 13, 14, 16, 19, 28                | 6.4261                      | 7.5530 | 4.6380 | 0.7660 | 218.4880 |
| <b>Test set</b>     | 34                        | 1, 2, 4-8, 10, 11, 15, 17, 18, 20-27, 29-42 | 5.7125                      | 7.0660 | 4.6780 | 0.7195 | 45.7000  |

**Table s7.** Results of Pharmacophore hypotheses generated by using the BEST method for CETP inhibitors

| Hypothesis no. | Total cost | Cost difference | Error cost | rms  | Correlation ( <i>R</i> ) | Features                       |
|----------------|------------|-----------------|------------|------|--------------------------|--------------------------------|
| 1              | 183.70     | 15.30           | 164.15     | 1.04 | 0.78                     | HBA, HBA1, HY-ARO, HY, HY1     |
| 2              | 183.70     | 15.30           | 164.40     | 1.05 | 0.77                     | HBA, HBA1, HY, HY1, HY2        |
| 3              | 184.22     | 14.78           | 164.94     | 1.06 | 0.77                     | HBA, HBA1, HY, HY1, HY2        |
| 4              | 186.05     | 12.95           | 166.67     | 1.10 | 0.75                     | HBA, HBA1, HY-ARO, HY, HY1     |
| 5              | 186.28     | 12.72           | 167.02     | 1.11 | 0.74                     | HBA, HY-ARO, HY-ARO1, HY-ARO2  |
| 6              | 186.64     | 12.36           | 167.29     | 1.11 | 0.74                     | HBA, HBA1, HY-ARO, HY, HY1     |
| 7              | 186.83     | 12.17           | 167.50     | 1.12 | 0.74                     | HBA, HBA1, HY-ARO, HY-ARO1, HY |
| 8              | 187.78     | 11.22           | 168.53     | 1.14 | 0.73                     | HBA, HBA1, HY-ARO              |
| 9              | 188.59     | 10.41           | 169.20     | 1.15 | 0.72                     | HBA, HBA1, HBA2, HY            |
| 10             | 188.75     | 10.25           | 169.36     | 1.16 | 0.72                     | HBA, HY-ARO, HY, HY1, HY2      |

Null cost= 199.00, Fixed cost= 160.52, Configuration=18.12, All cost units are in bits.

**Table s8.** Results of Pharmacophore hypotheses generated by using the FAST method for CETP inhibitors

| Hypothesis no. | Total cost | Cost difference | Error cost | rms  | Correlation ( <i>R</i> ) | Features                   |
|----------------|------------|-----------------|------------|------|--------------------------|----------------------------|
| 1              | 181.91     | 17.09           | 163.77     | 1.03 | 0.78                     | HBA, HY-ARO, HY-ARO1, HY   |
| 2              | 183.45     | 15.55           | 164.78     | 1.06 | 0.77                     | HBA, HBA1, HY, HY1         |
| 3              | 183.81     | 15.19           | 165.68     | 1.08 | 0.76                     | HBA, HBA1, HY, HY-ARO      |
| 4              | 184.74     | 14.26           | 166.62     | 1.1  | 0.75                     | HBA, HBA1, HY, HY1, HY2    |
| 5              | 185.06     | 13.94           | 166.93     | 1.11 | 0.75                     | HBA, HBA1, HY, HY1         |
| 6              | 185.68     | 13.32           | 167.56     | 1.12 | 0.74                     | HBA, HBA1, HY-ARO, HY      |
| 7              | 186.21     | 12.79           | 167.52     | 1.12 | 0.74                     | HBA, HY-ARO, HY            |
| 8              | 186.58     | 12.42           | 168.42     | 1.14 | 0.73                     | HBA, HY-ARO, HY, HY1, HY2  |
| 9              | 186.65     | 12.35           | 168.36     | 1.14 | 0.73                     | HBA, HBA1, HY-ARO, HY, HY1 |
| 10             | 186.71     | 12.29           | 168.57     | 1.14 | 0.73                     | HBA, HY, HY1, HY2, HY3     |

Null cost= 199.00, Fixed cost= 159.39, Configuration=16.99, All cost units are in bits.

**Table s9a.** Fischer's randomization test for the hypotheses 1 generated by the BEST method of conformer search

| <b>Validation</b> | <b>Correlation coefficient</b> |
|-------------------|--------------------------------|
| random1           | 0.612                          |
| random2           | 0.748                          |
| random3           | 0.666                          |
| random4           | 0.671                          |
| random5           | 0.637                          |
| random6           | 0.615                          |
| random7           | 0.660                          |
| random8           | 0.000                          |
| random9           | 0.702                          |
| random10          | 0.621                          |
| random11          | 0.000                          |
| random12          | 0.000                          |
| random13          | 0.632                          |
| random14          | 0.675                          |
| random15          | 0.000                          |
| random16          | 0.619                          |
| random17          | 0.666                          |
| random18          | 0.591                          |
| random19          | 0.624                          |
| Average ( $R_r$ ) | 0.513                          |

**Table s9b.** Fischer's randomization test for the hypotheses 1 and 4 generated by the FAST method of conformer search

| <b>Validation</b> | <b>Correlation coefficient<br/>for hypothesis 1</b> | <b>Correlation coefficient<br/>for hypothesis 4</b> |
|-------------------|-----------------------------------------------------|-----------------------------------------------------|
| random1           | 0.000                                               | 0.417                                               |
| random2           | 0.588                                               | 0.543                                               |
| random3           | 0.000                                               | 0.465                                               |
| random4           | 0.559                                               | 0.537                                               |
| random5           | 0.547                                               | 0.540                                               |
| random6           | 0.653                                               | 0.620                                               |
| random7           | 0.679                                               | 0.661                                               |
| random8           | 0.000                                               | 0.487                                               |
| random9           | 0.000                                               | 0.461                                               |
| random10          | 0.000                                               | 0.462                                               |
| random11          | 0.000                                               | 0.495                                               |
| random12          | 0.579                                               | 0.538                                               |
| random13          | 0.688                                               | 0.621                                               |
| random14          | 0.000                                               | 0.508                                               |
| random15          | 0.566                                               | 0.510                                               |
| random16          | 0.590                                               | 0.556                                               |
| random17          | 0.659                                               | 0.604                                               |
| random18          | 0.000                                               | 0.402                                               |
| random19          | 0.664                                               | 0.644                                               |
| Average ( $R_c$ ) | 0.356                                               | 0.530                                               |
